# Supplementary material for: Alpha-Mangostin Ameliorates Bleomycin-Induced Pulmonary Fibrosis in Mice Partly Through Activating Adenosine 5′-Monophosphate-Activated Protein Kinase
Source: PubMed Central journal article supplement (PMC6863977; doi:10.3389/fphar.2019.01305), 2019-11-13
Supplement: Image_1.pdf [file Image_1.pdf]

## Supplementary Material

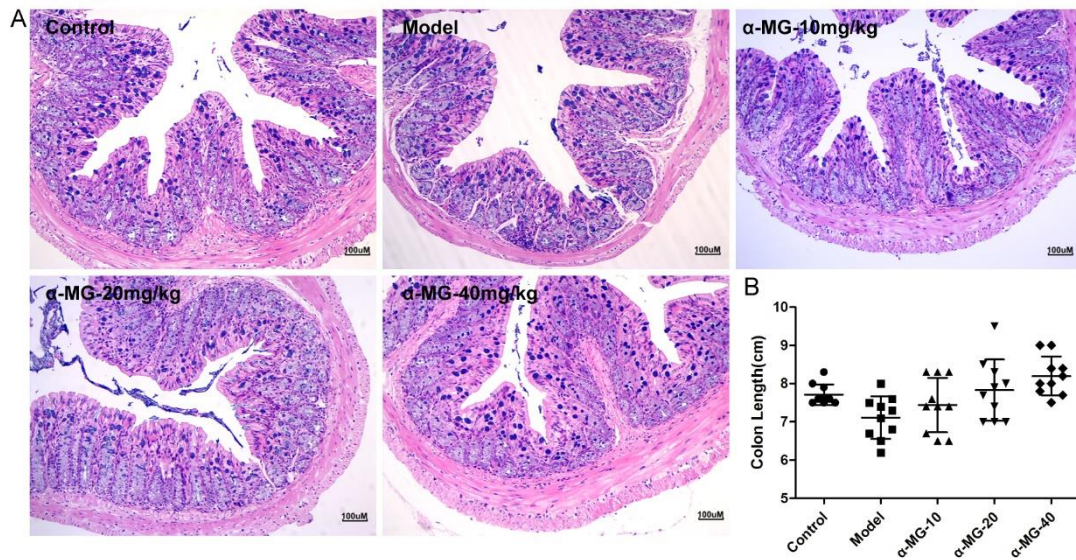

**Fig. S1** Evaluate the effects of  $\alpha$ -MG at the dose of 10 mg/kg on colonic lesions. One week after BLM treatment (5 mg/kg), mice were orally administered with  $\alpha$ -MG (10, 20, 40 mg/kg) once a day for 14 days. Mouse lungs were collected on day 21 after BLM treatment. The representative H&E-stained colon sections (magnification  $\times 100$ ) (A) and colon length (B) from each group of mice were shown. Data were expressed as the mean  $\pm$  S.D. (n = 10). NS, non-significant.
