# Supplementary material for: Alpha-Mangostin Ameliorates Bleomycin-Induced Pulmonary Fibrosis in Mice Partly Through Activating Adenosine 5′-Monophosphate-Activated Protein Kinase
Source: PubMed Central journal article supplement (PMC6863977; doi:10.3389/fphar.2019.01305), 2019-11-13
Supplement: Image_2.pdf [file Image_2.pdf]

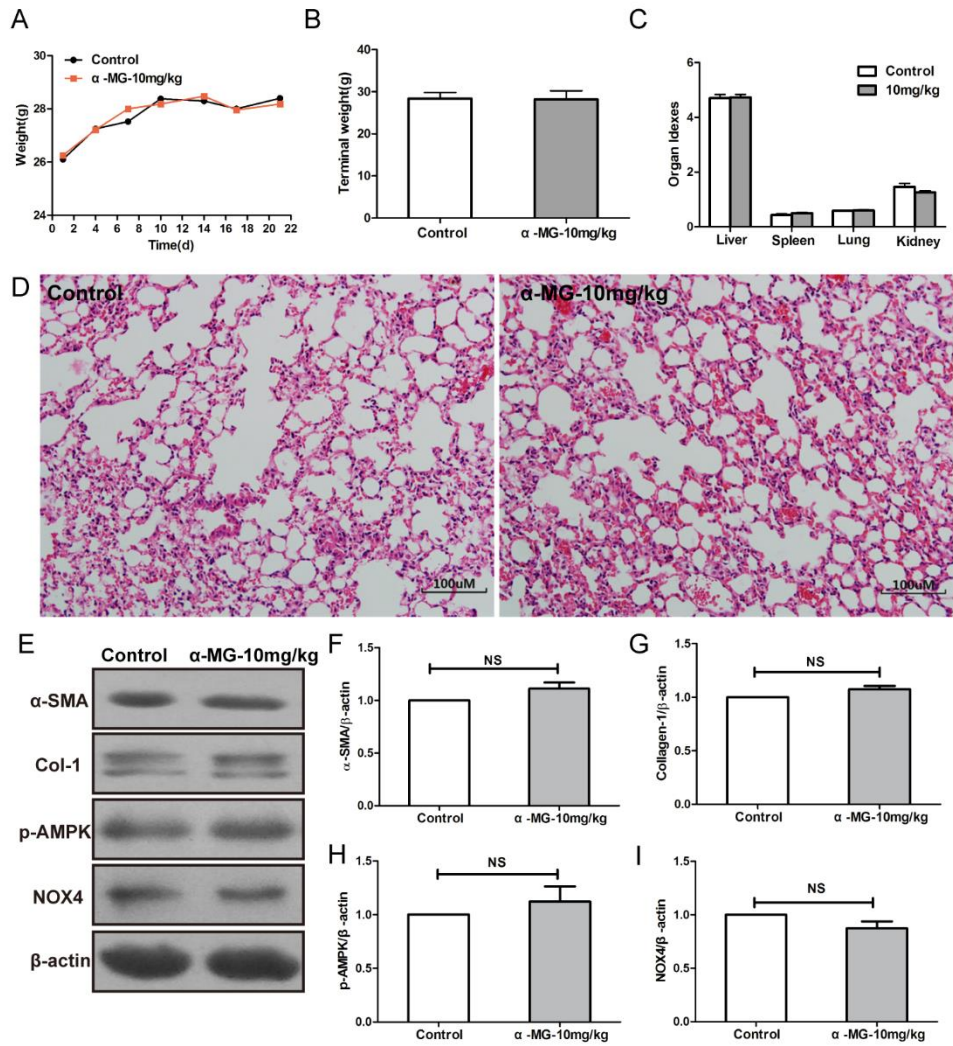

**Fig. S2** Evaluate the toxicity of  $\alpha$ -MG treatment on mice at the dose of 10 mg/kg. Mice were given an intragastric administration of  $\alpha$ -MG (10 mg/kg) every day and they were euthanized on day 21. The body weight and terminal weight (A and B), organ index (C) were determined, and the representative images (H&E staining) among the experimental groups (D) were shown. Representative H&E-stained tissue sections of lungs under  $200\times$  magnification. Protein expressions of  $\alpha$ -SMA, Col I, p-AMPK, NOX4 (E-I) were detected by western blot analysis. Data were expressed as the mean  $\pm$  S.D. (n = 9). NS, non-significant.
